## Interactions between zooplankton feeding, photosynthesis and skeletal growth in the scleractinian coral *Stylophora pistillata*

Fanny Houllbrèque\*, Eric Tambutté, Denis Allemand and Christine Ferrier-Pagès

Centre Scientifique de Monaco, Avenue Saint-Martin, MC-98000 Monaco (Principality)

\*Author for correspondence (e-mail: fhoullbreque@centrescientifique.mc)

Accepted 2 February 2004

### Summary

We investigated the effect of zooplankton feeding on tissue and skeletal growth of the scleractinian coral *Stylophora pistillata*. Microcolonies were divided into two groups: starved corals (SC), which were not fed during the experiment, and fed corals (FC), which were abundantly fed with *Artemia salina* nauplii and freshly collected zooplankton. Changes in tissue growth, photosynthesis and calcification rates were measured after 3 and 8 weeks of incubation. Calcification is the deposition of both an organic matrix and a calcium carbonate layer, so we measured the effect of feeding on both these parameters, using incorporation of  $^{14}\text{C}$ -aspartic acid and  $^{45}\text{Ca}$ , respectively. Aspartic acid is one of the major components of the organic matrix in scleractinian corals. For both sampling times, protein concentrations were twice as high in FC than in SC ( $0.73$  vs  $0.42$  mg  $\text{P}^{-1}$   $\text{cm}^{-2}$  skeleton) and chlorophyll  $c_2$  concentrations were 3–4 times higher in fed corals ( $2.1 \pm 0.3$   $\mu\text{g cm}^{-2}$ ). Cell specific density (CSD), which corresponds to the number of algal cells inside a host cell, was also significantly higher in FC ( $1.416 \pm 0.028$ ) than in SC ( $1.316 \pm 0.015$ ). Fed corals therefore displayed a higher

rate of photosynthesis per unit area ( $P_{\text{max}}^g = 570 \pm 60$  nmol  $\text{O}_2$   $\text{cm}^{-2}$   $\text{h}^{-1}$  and  $I_k = 403 \pm 27$   $\mu\text{mol photons m}^{-2}$   $\text{s}^{-1}$ ). After 8 weeks, both light and dark calcification rates were twofold greater in FC ( $3323 \pm 508$  and  $416 \pm 58$  nmol  $\text{Ca}^{2+}$   $2$   $\text{h}^{-1}$   $\text{g}^{-1}$  dry skeletal mass) compared to SC ( $1560 \pm 217$  and  $225 \pm 35$  nmol  $\text{Ca}^{2+}$   $2$   $\text{h}^{-1}$   $\text{g}^{-1}$  dry skeletal mass, respectively, under light and dark conditions). Aspartic acid incorporation rates were also significantly higher in FC ( $10.44 \pm 0.69$  and  $1.36 \pm 0.26\%$  RAV  $2$   $\text{h}^{-1}$   $\text{g}^{-1}$  dry skeletal mass, where RAV is total radioactivity initially present in the external medium) than in SC ( $6.51 \pm 0.45$  and  $0.44 \pm 0.02\%$  RAV  $2$   $\text{h}^{-1}$   $\text{g}^{-1}$  dry skeletal mass under dark and light conditions, respectively). Rates of dark aspartic acid incorporation were lower than the rates measured in the light. Our results suggest that the increase in the rates of calcification in fed corals might be induced by a feeding-stimulation of organic matrix synthesis.

Key words: coral, feeding, photosynthesis, calcification, organic matrix,  $^{14}\text{C}$ -aspartate,  $^{45}\text{Ca}$ .

### Introduction

Scleractinian corals derive their nutritional needs, in part, from photosynthates translocated by their symbiotic zooxanthellae (Muscatine, 1990). The effects and mechanisms of autotrophy have been well documented (Muscatine, 1980). Corals nevertheless are true heterotrophs, ingesting a wide range of food such as dissolved and particulate organic matter (Anthony, 1999; Anthony and Fabricius, 2000), sediment (Rosenfeld et al., 1999), bacteria (Farrant et al., 1987; Sorokin, 1991) and zooplankton (Lasker et al., 1983; Lewis, 1992; Ferrier-Pagès et al., 1998; Sebens et al., 1996). The relative importance of phototrophy vs. heterotrophy is still partially understood. In shallow waters and high-light-adapted corals, photosynthesis alone may meet all the nutritional needs (Falkowski et al., 1984) while in deep living corals or in some species depending mostly on predation, photosynthesis may only supply a small fraction of this energy demand (Szmant-Froelich and Pilson, 1984; for a review, see Barnes and

Chalker, 1990). Corals living in turbid environments are also more dependent on heterotrophy than those living in clear waters (Anthony and Fabricius, 2000).

The major role of feeding is to provide the symbiosis with essential nutrients such as nitrogen and phosphorus (Rahav et al., 1989; Cook et al., 1994). Both host and algal symbionts respond quickly to food availability (Fitt, 2000). At the algal level, Dubinsky et al. (1990) as well as Titlyanov et al., (2000a,b, 2001) showed an enhancement of the areal pigmentation and zooxanthellae density in fed corals, leading to an increase in the areal photosynthesis. At the animal level, heterotrophy tends to increase the amount of tissue synthesis (Jacques and Pilson, 1980; Sebens and Johnson, 1991; Kim and Lasker, 1998). An enhancement in skeletal growth has also been observed, suggesting that corals allocate a high proportion of the energy brought by food to calcification processes (Jacques and Pilson, 1980; Witting, 1999; Ferrier-

Pagès et al., 2003; Houlbrèque et al., 2003). Although it is well known that nutrients are continuously exchanged between the two partners (Muscatine, 1990), few studies have focused on the simultaneous effect of feeding on the algal and animal components (Witting, 1999; Ferrier-Pagès et al., 2003; Houlbrèque et al., 2003). Here, we build on this knowledge base by providing an experimental analysis of the interactions between heterotrophy, photosynthesis and calcification in corals.

Feeding has also been shown to enhance skeletal growth, suggesting that corals allocate a high proportion of the energy brought by food to calcification processes (Jacques and Pilson, 1980; Witting, 1999; Ferrier-Pagès et al., 2003; Houlbrèque et al., 2003). It is important to note that calcification is also a dual process, involving the secretion of an organic matrix and the deposition of a CaCO<sub>3</sub> fraction. The presence of an organic matrix in coral skeletons is widely documented (Goreau and Goreau, 1959; Wainwright, 1963; Young, 1971; Constantz and Weiner, 1988; Cuif and Gautret, 1995; Dauphin and Cuif, 1997) and is considered an essential prerequisite in the formation of a biomineral structure (Goreau and Goreau, 1959; Cuif et al., 1997; Allemand et al., 1998). This matrix potentially plays key roles in various processes such as crystal nucleation and growth, crystal size and orientation and regulation of skeletal formation (Weiner and Addadi, 1991; Falini et al., 1996; Belcher et al., 1996). Cuif et al. (1999) demonstrated that the composition of the matrix was different between symbiotic and asymbiotic corals, and Allemand et al. (1998) suggested that heterotrophy is a source of aspartic acid, one of the major components of the coral matrix (Young, 1971; Cuif and Gautret, 1995; Dauphin and Cuif, 1997). We therefore investigated the effect of feeding on both organic matrix synthesis and calcification.

## Materials and methods

### *Biological material*

Experiments were conducted in the laboratory using microcolonies (1 cm long fragments) of the scleractinian coral *Stylophora pistillata* Esper, 1797. The advantages of using microcolonies in radioactive experiments are described in Tambutté et al. (1995). 140 terminal portions of branches were cut from ten different parent colonies placed and maintained on separate nylon nets. 14 nubbins were cut from each parent colony and kept on separated nylon nets during the healing period. After 3 weeks, coral fragments were entirely covered with new tissue and were ready to be used for the experiments. 35 microcolonies (3–4 microcolonies from each parent colonies) were assigned to each of the four aquaria. The growth of the microcolonies was monitored twice a week for 3 weeks, using the buoyant weight technique (Jokiel et al., 1978). An analysis of variance (ANOVA) performed on these growth rates showed no significant clone or aquaria effects ( $P > 0.05$ ).

Tanks were supplied with oligotrophic Mediterranean seawater, pumped from 50 m depth at a rate of 2 l h<sup>-1</sup> and mixed using a submersible pump (Aquarium system, mini-jet

MN 606, Mentor, OH, USA). The velocity of flow across the corals was approximately 0.6–1 cm s<sup>-1</sup>, as measured by timing the passage of neutrally buoyant beads. Filtered seawater, maintained at 26°C, had low amounts of organic and inorganic nutrients (Ferrier-Pagès et al., 1998). Corals received a constant irradiance of 350 μmol photons m<sup>-2</sup> s<sup>-1</sup> (photoperiod was 12 h:12 h light:dark) using metal halide lamps (Philips, HPIT, 400 W, Eindhoven, The Netherlands). Tanks and nylon nets were cleaned several times per week in order to avoid algal growth on the nylon nets.

### *Experimental design*

Microcolonies were then divided into two groups (two tanks per group) corresponding to two feeding levels: (1) starved corals (SC) were not fed during the whole experiment; (2) fed corals (FC) were fed 4 days per week (Monday, Wednesday, Thursday and Friday). On Monday and Friday corals were fed *Artemia salina* nauplii (2022±115 shrimps l<sup>-1</sup>) and on Wednesday and Thursday they were fed freshly collected Mediterranean zooplankton (1005±164 organisms l<sup>-1</sup>). Copepods represented 94% of the plankton, followed by lesser numbers of siphonophores, brachiopods, crustacean larvae and jellyfish. The ingestion of prey was controlled under a dissecting microscope during feeding (Ferrier-Pagès et al., 2003). The number of prey items ingested was proportional to prey density and capture rates varied from 0.06 to 1 prey items polyp<sup>-1</sup> day<sup>-1</sup> (Ferrier-Pagès et al., 2003). These rates were in the same range as previous estimates for other coelenterates (Lasker et al., 1983; Sebens et al., 1996).

Plankton were collected using a WP2 net and immediately brought back to the laboratory. They were concentrated with a reverse filtration apparatus on a 10 μm filter, to remove small algae and detritus. They were then added to heated seawater, and the actively swimming portion of the sample was fed to the corals during a 1 h period. A 100 ml sample was collected from the aquaria at each feeding time to determine the nature and abundance of the planktonic prey using a binocular microscope (Wild M3, 40×) and a Dolfuss tank. After feeding, the aquaria were emptied entirely and refilled with fresh filtered seawater to avoid contamination by dissolved and organic nutrients coming from the degrading prey.

Microcolonies were maintained under these conditions for 8 weeks. Changes in photosynthesis, tissue composition (protein and chlorophyll contents), cell-specific density (CSD), rates of aspartic acid incorporation and calcification were measured after 3 and/or 8 weeks, depending on the assay.

### *Photosynthesis–irradiance (P/I) curves*

Rates of photosynthesis and respiration were measured after 3 weeks on five microcolonies (replicates) taken from each tank (total=20 colonies, 10 fed and 10 starved corals, respectively). Each microcolony was placed in a respirometric glass chamber containing a 'Strathkelvin 928®' electrode (Glasgow, UK) and immersed in a water bath (26°C). The incubation medium was continuously stirred with a magnetic stirring bar. Photosynthesis vs. irradiance (P/I) curves were

constructed by measuring production rates across a range of irradiances. Samples were incubated for 10 min under different light levels (0, 50, 80, 120, 200, 300, 400, 500, 600, 800  $\mu\text{mol m}^{-2} \text{s}^{-1}$ ). Light was provided by a 400 W metal halide lamp (Philips, HPIT) attenuated to the desired intensity with screens placed between the light source and the aquaria. Before each experiment, the oxygen sensor was calibrated against air-saturated seawater (100% oxygen) and a saturated solution of sodium dithionite (zero oxygen). Oxygen was monitored every 10 s on an acquisition station. Rates of photosynthesis and respiration were estimated by regressing oxygen data against time.

The following function was fitted to the photosynthesis–irradiance data (Barnes and Chalker, 1990).

$$P_{\text{net}} = (P_{\text{max}}^g) \tanh(I/I_k) + R, \quad (1)$$

where  $P_{\text{net}}$  is the net photosynthetic rate, expressed in  $\mu\text{mol O}_2 \text{ cm}^{-2} \text{ h}^{-1}$  or in  $\mu\text{mol O}_2 (\text{chlorophyll } a)^{-1} \text{ h}^{-1}$ .  $P_{\text{max}}^g$  is the maximum gross photosynthetic rate ( $\mu\text{mol O}_2 \text{ cm}^{-2} \text{ h}^{-1}$ ),  $\tanh$  is the hyperbolic tangent,  $I$  is the irradiance ( $\mu\text{mol photon m}^{-2} \text{ s}^{-1}$ ),  $I_k$  is the irradiance at which the initial linear portion of the curve intersects  $P_{\text{max}}^g$  (Talling index, i.e. saturation constant) and  $R$  is the respiration rate in the dark ( $\mu\text{mol O}_2 \text{ cm}^{-2} \text{ h}^{-1}$ ). From these  $P/I$  curves, two other parameters were determined:  $I_c$ , representing the light intensity at which the oxygen production equalled the oxygen consumption (compensation intensity), and  $\alpha$ , the initial slope of the  $P/I$  curve (photosynthetic efficiency,  $\alpha = P_{\text{max}}^g/I_k$ ).

From the same corals, chlorophylls  $a$  and  $c_2$  were extracted twice in 100% acetone (24 h at 4°C). The extracts were centrifuged at 6000  $g$  for 20 min and the absorbencies read at 630, 663 and 750 nm. Chlorophyll concentrations were computed according to the spectrometric equations of Jeffrey and Humphrey (1975) and were expressed per surface area ( $\text{cm}^2$ ). Surface area was measured using the aluminium foil technique (Marsh, 1970).

#### Estimation of the cell-specific density (CSD)

After 3 weeks, CSD was determined for five colonies (replicates) taken from each tank ( $N=10$  fed and 10 starved corals, respectively). Cells were extracted mechanically by shaking (using a wrist-action) crushed coral in a flask (Muscatine and Cernichiari, 1969). Host cells containing symbionts were observed under a Leica microscope (50 $\times$ ; Wetzlar, Germany), and the number of algae contained in each cell was counted for 300 host cells per sample. Data were expressed in terms of the frequency or percentage distribution of host cells ( $f_i$ ) with a given number of algae per cell ( $r_i$ ).

The average cell-specific density (CSD) was calculated as:

$$\text{CSD} = \sum(r_i \times f_i) / \sum f_i. \quad (2)$$

#### Measurements of skeletal calcium and aspartic acid incorporation

Measurements were performed both in the light and in the dark after 3 and 8 weeks of treatment. Corals were incubated

in the morning to avoid variations due to endogenous circadian rhythms (Buddemeier and Kinzie, 1976; Tambutté et al., 1995). For each sampling period (3 and 8 weeks), three replicates microcolonies, randomly taken in each tank, were used for each measurement (a total of 48 colonies,  $N=6$  for starved and fed corals and each measurement, respectively). Calcification rates were measured using  $^{45}\text{Ca}$  according to the method of Tambutté et al. (1995). Organic matrix synthesis was measured as skeletal incorporation of  $^{14}\text{C}$ -aspartic acid and protocols were adapted from Allemand et al. (1998) and Tambutté et al. (1995, 1996).  $^{45}\text{Ca}$ - and  $^{14}\text{C}$ -aspartic acid incorporations were studied in separate colonies.

Each microcolony was placed in a plastic holder and incubated for 2 h in an 8 ml beaker containing either 16 kBq  $\text{ml}^{-1}$  of  $^{45}\text{CaCl}_2$  (NEN, LifeScience Products, France) or 833 Bq  $\text{ml}^{-1}$  of  $^{14}\text{C}$ -aspartic acid (NEN) dissolved in seawater. Corals for dark incubations were sampled at the end of the night (1 h before the lights were switched on) and were maintained in the dark during the whole incubation. The results are expressed either as  $\text{nmol Ca}^{2+} \text{ g}^{-1}$  dry skeletal mass or as a fraction of the total radioactivity initially present in the external medium (%RAV;  $^{14}\text{C}$ -aspartic acid  $\text{g}^{-1}$  dry skeletal mass) (Allemand et al., 1998). Protein content of the radioactive tissue was measured using the BC Assay Kit (Interchim, Montluçon, France), based on the colorimetric determination of the amount of protein (Smith et al., 1985). The standard curve was established with bovine serum albumin.

In the Results, the amounts of protein and chlorophyll are normalized per unit surface area and the rates of photosynthesis per unit surface area or per amount of chlorophyll. The rates of calcification and aspartic acid incorporation are normalized per g skeletal dry mass in order to facilitate comparisons with the previous results of Allemand et al. (1998).

#### Statistical analyses

The effects of feeding on the physiological parameters were tested using a  $t$ -test (software Stat-View 4.01, Abacus concept, Inc, Berkeley, CA, USA). The effect of feeding on the CSD was analysed using a Pearson  $\chi^2$  test.

## Results

#### Chlorophyll and protein content

After 3 and 8 weeks of treatments, protein concentrations were significantly higher in fed (FC) than in starved corals (SC) (Fig. 1A,B, Table 1). Concentrations of chlorophyll- $a$  per unit surface skeleton were, however, comparable in fed and starved corals (Fig. 1C, Table 1). Conversely, feeding significantly increased chlorophyll  $c_2$  concentrations (Fig. 1C, Table 1) roughly three- to fourfold.

#### Photosynthesis–irradiance (P/I) curves

Mean P/I curves obtained for each treatment are shown in Fig. 2. Table 2 represents the calculated mean values for  $P_{\text{max}}^n$ ,  $I_k$ ,  $I_c$  and  $\alpha$ . When normalized per surface area, feeding significantly increased the rates of maximum net

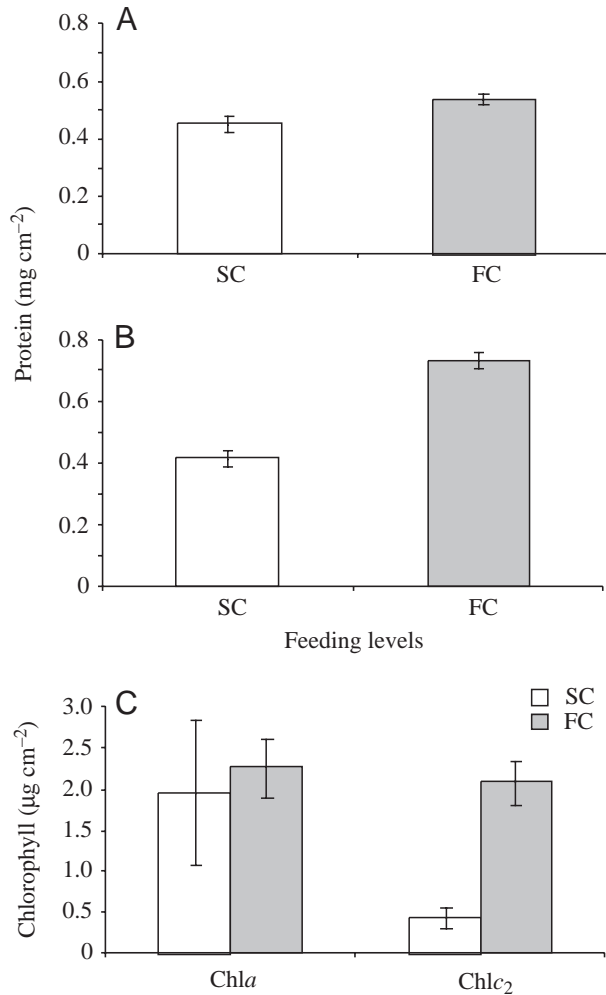

Fig. 1. Protein concentration after (A) 3 weeks of incubation ( $N=6$ ) and (B) 8 weeks of incubation ( $N=6$ ); (C) chlorophyll (Chl) concentrations after 3 weeks for starved and fed corals ( $N=10$ ). Values are means  $\pm$  S.D. White bars, starved corals (SC); grey bars, fed corals (FC).

photosynthesis ( $P_{\max}^n$ ) ( $570\pm 60$  vs.  $200\pm 20$  nmol O<sub>2</sub> cm<sup>-2</sup> h<sup>-1</sup> for FC and SC, respectively) and the Talling index ( $I_k$ ) ( $403\pm 27$  and  $203\pm 11$   $\mu$ mol photons m<sup>-2</sup> s<sup>-1</sup>, respectively, for FC and SC). Conversely, when data were normalised per chlorophyll *a* concentrations, feeding did not have any significant effect on  $P_{\max}^n$  ( $t$ -test, d.f.=4,  $P=0.13$ ) (Table 2). For both normalizations, there was no significant difference in the respiration rates between FC and SC ( $t$ -test, d.f.=0.6,  $P=0.50$ ) (Table 2).

#### Cell-specific density

Fig. 3 shows the percentage distribution of the number of algae per host cell. Host cells containing a single dinoflagellate (singlet) predominate (62.3% and 70.4% of the total cells for FC and SC, respectively) followed in decreasing frequency by those containing two (doublet) (34.3% in FC and 28.3% in SC), three (triplet; 3.0% in FC and 0.7% in SC), and up to four cells (quadruplet; 0.4% in FC and 0.7% in SC). In FC, the number

Table 1. The effect of feeding on the chlorophyll and protein contents, on the rates of light and dark calcification and on the light and dark uptake of aspartic acid for each sampling time

|                                   | d.f. | Effect of feeding    |                 |
|-----------------------------------|------|----------------------|-----------------|
|                                   |      | <i>F</i>             | <i>P</i>        |
| Proteins                          |      |                      |                 |
| <i>T</i> <sub>0+3</sub>           | 1    | 16.17                | <b>&lt;0.01</b> |
| <i>T</i> <sub>0+8</sub>           | 1    | 23.94                | <b>&lt;0.01</b> |
| Chlorophyll <i>a</i>              | 1    | 0.20                 | 0.68            |
| Chlorophyll <i>c</i> <sub>2</sub> | 1    | 116.26               | <b>&lt;0.01</b> |
| Photosynthesis parameters         |      |                      |                 |
| $P_{\max}^g$                      | 1    | 115.32               | <b>&lt;0.01</b> |
| $I_k$                             | 1    | 46.02                | <b>&lt;0.01</b> |
| $I_c$                             | 1    | $1.15\times 10^{-4}$ | 0.99            |
| Respiration                       | 1    | 0.02                 | 0.89            |
| $\alpha$                          | 1    | 1.81                 | 0.25            |
| Calcification                     |      |                      |                 |
| Light                             |      |                      |                 |
| <i>T</i> <sub>0+3</sub>           | 1    | 4.00                 | 0.12            |
| <i>T</i> <sub>0+8</sub>           | 1    | 12.57                | <b>0.02</b>     |
| Dark                              |      |                      |                 |
| <i>T</i> <sub>0+3</sub>           | 1    | 38.01                | <b>&lt;0.01</b> |
| <i>T</i> <sub>0+8</sub>           | 1    | 9.13                 | <b>0.03</b>     |
| Uptake of aspartic acid           |      |                      |                 |
| Light                             |      |                      |                 |
| <i>T</i> <sub>0+3</sub>           | 1    | 0.02                 | 0.89            |
| <i>T</i> <sub>0+8</sub>           | 1    | 22.80                | <b>&lt;0.01</b> |
| Dark                              |      |                      |                 |
| <i>T</i> <sub>0+3</sub>           | 1    | 0.20                 | 0.68            |
| <i>T</i> <sub>0+8</sub>           | 1    | 12.13                | <b>0.03</b>     |

*P*, probability; significant values ( $P<0.05$ ) are indicated in bold. *T*<sub>0</sub>, time at start of experiment; +3, +8 indicates +3 weeks and +8 weeks feeding, respectively;  $\alpha$ , initial slope;  $P_{\max}^g$ , maximum gross photosynthetic rate;  $I_k$ , Talling index;  $I_c$ , compensation intensity (see Materials and methods for details).

of doublets and triplets significantly increased during the incubation compared to the SC. Therefore, CSD was significantly higher in FC ( $1.416\pm 0.028$ ) than in SC ( $1.316\pm 0.015$ ) (Pearson  $\chi^2$  test, d.f.=1,  $P=0.04$ ).

#### Calcification rates

After 3 weeks, there was no significant difference in the calcification rates measured in the light between FC and SC (Fig. 4A, Table 1). However, after 8 weeks, FC showed significantly higher light calcification rates than SC (Fig. 4B, Table 1). For the two sampling periods, feeding enhanced the dark calcification rates, which were twice as high in FC compared to starved corals (Fig. 4A,B, Table 1). For the two sampling periods, rates of dark calcification were 6–10 times lower than those of light calcification (Fig. 4A,B).

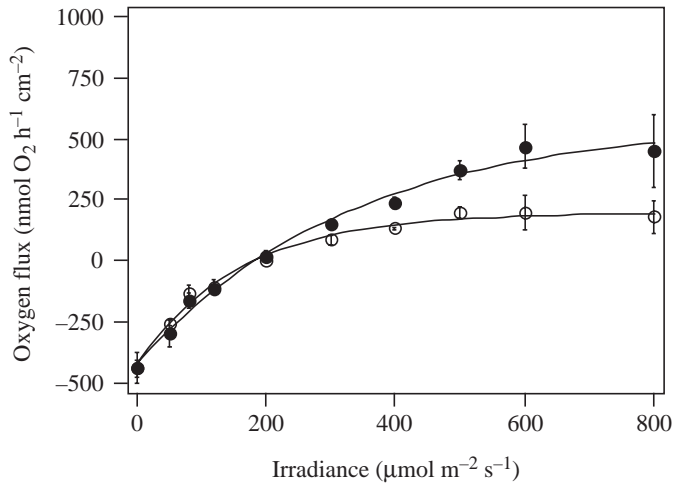

Fig. 2. Net photosynthesis (measured as oxygen flux) for starved (white circles) and fed (black circles) corals at various irradiance levels. Values are means  $\pm$  S.D.,  $N=10$ .

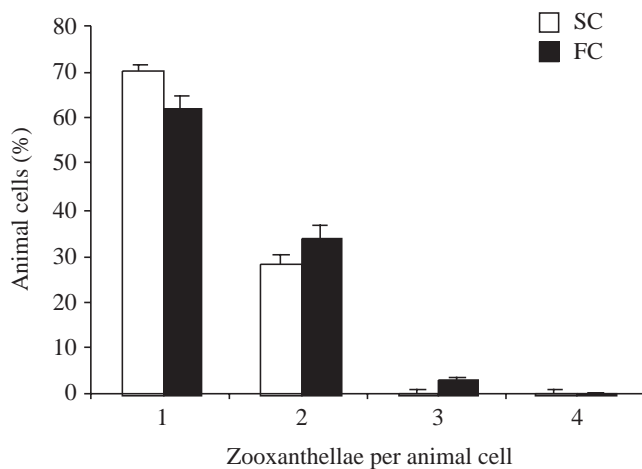

Fig. 3. Distribution percentage of zooxanthellae in starved and fed coral cells. Values are means  $\pm$  S.D.,  $N=10$ .

#### Effects of feeding on organic matrix synthesis

After 3 weeks, we found no significant effect of feeding on the light and dark incorporations (Fig. 5A, Table 1). After 8 weeks, however, feeding significantly changed the rate of incorporation in both the light and the dark (Fig. 5B, Table 1). Incorporation rates in the light were increased by two thirds in FC compared to SC. The uptake rates in the dark were three times higher in FC than in SC. In both cases, darkness markedly reduced the incorporation of  $^{14}\text{C}$  aspartic acid into the skeleton (Fig. 5A,B). After 8 weeks, the rates of incorporation in the dark were, respectively, 14 and 8 times lower than the uptake rates in the light for starved and fed corals (Fig. 5B). Feeding did not affect the ratios of calcification rate/aspartic acid incorporation, measured in the light (Fig. 6). However this ratio is 1.82–2.64 higher in the dark for both fed and starved corals, respectively.

Table 2. Parameter estimates for the photosynthesis curves

| Parameter estimates                                                                                                | SC                 | FC                  |
|--------------------------------------------------------------------------------------------------------------------|--------------------|---------------------|
| $r^2$                                                                                                              | 0.98               | 0.99                |
| $P_{\max}^n$ ( $\mu\text{mol O}_2 \text{ h}^{-1} \text{ cm}^{-2}$ )                                                | $0.20 \pm 0.02$    | $0.57 \pm 0.06$     |
| $R$ ( $\mu\text{mol O}_2 \text{ h}^{-1} \text{ cm}^{-2}$ )                                                         | $-0.44 \pm 0.02$   | $-0.43 \pm 0.04$    |
| $\alpha$ ( $\text{nmol O}_2 \text{ h}^{-1} \text{ cm}^{-2}$ )<br>( $\mu\text{mol photons m}^{-2} \text{ s}^{-1}$ ) | $1.04 \pm 0.28$    | $1.21 \pm 0.18$     |
| $P_{\max}^n$ ( $\mu\text{mol O}_2$ ) (mg Chl $a$ ) $^{-1} \text{ h}^{-1}$ )                                        | $106.83 \pm 24.9$  | $190.900 \pm 33.8$  |
| $R$ ( $\mu\text{mol O}_2$ ) (mg Chl $a$ ) $^{-1} \text{ h}^{-1}$ )                                                 | $-244.66 \pm 76.6$ | $-167.55 \pm 29.45$ |
| $I_k$ ( $\mu\text{mol photons m}^{-2} \text{ s}^{-1}$ )                                                            | $203.04 \pm 10.99$ | $403.81 \pm 27.48$  |
| $I_c$ ( $\mu\text{mol photons m}^{-2} \text{ s}^{-1}$ )                                                            | $182.98 \pm 6.90$  | $182.88 \pm 5.83$   |

$r^2$  is the statistical fit of the curve,  $P_{\max}^n$  is the net maximal photosynthetic rate,  $R$  is the respiration rate in the dark and  $\alpha$  is the initial slope (see Materials and methods for details).  $I_k$ , Talling index;  $I_c$ , compensation irradiance.

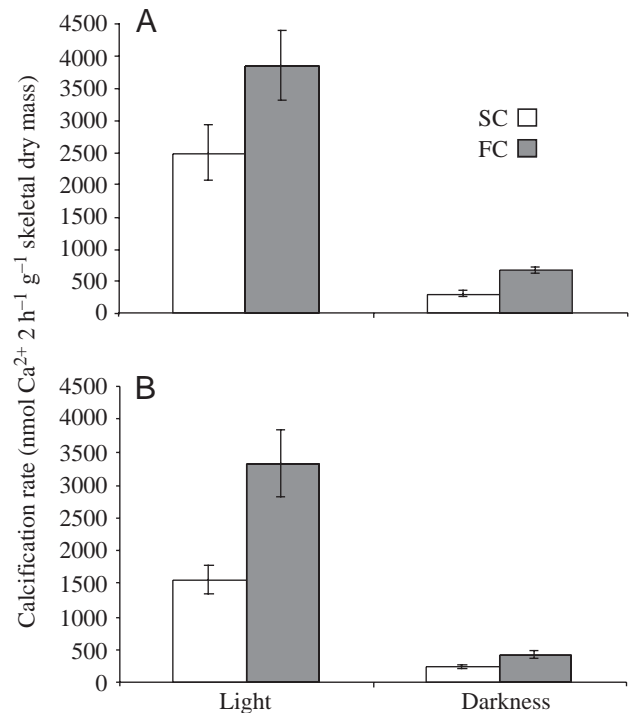

Fig. 4. Calcification rates measured after (A) 3 weeks and (B) 8 weeks in light and dark. Values are means  $\pm$  S.D.,  $N=6$ . Fed corals (black bars); starved corals (white bars).

#### Discussion

Feeding induced significant changes in most of the physiological parameters measured. The increase in tissue growth (significant after 3 weeks) was faster than the increase in skeletal growth (significant only after 8 weeks). This is in agreement with the findings of Anthony et al. (2002), who suggest that either tissue may react more rapidly than the skeleton to availability of resources, or that the energy content of the tissue may represent a major component of the total

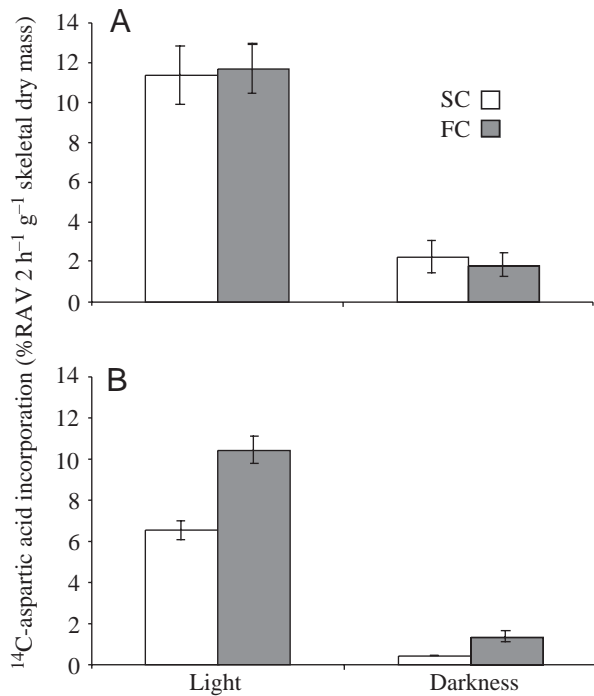

Fig. 5. Rates of <sup>14</sup>C-aspartic acid incorporation after (A) 3 weeks and (B) 8 weeks in light or dark conditions. Values are means  $\pm$  S.D.,  $N=6$ . Fed corals (black bars); starved corals (white bars).

energy investment in coral growth. In a previous experiment, Ferrier-Pagès et al. (2003) estimated that the amount of carbon and nitrogen ingested by *S. pistillata* fed with zooplankton over a 4 week period represented one-third of the carbon and nitrogen needed for the estimated tissue growth. In the present study, we also observed that feeding increased the number of zooxanthellae per host cell. Feeding therefore enhanced the growth of the algal component at a higher rate than the growth of the animal cells. A similar increase in CSD was observed in an environment enriched in inorganic nitrogen (Muscatine et al., 1998), suggesting that the algae are nitrogen-limited in the symbionts. When collected *in situ* in the same environment, different coral species do not display the same CSD, which ranged from ca. 50% of doublets in *Madracis mirabilis* to 20% in *Acropora palmata* (Muscatine et al., 1998). This may suggest different feeding capacities for different species, with 'effective' predators displaying a higher CSD than 'poor' predators. For example, previous studies have established that *M. mirabilis* (high CSD) is a 'voracious' feeder (Sebens et al., 1996) and capable of capturing more prey than more 'autotrophic' species with smaller CSDs. Our results are consistent with the study of Muscatine et al. (1998), since a difference in CSD was observed for microcolonies of *S. pistillata* benefiting from a food supply. However, the validity of this underlying relationship deserves further testing.

One of the aims in this work was to understand by which mechanism feeding enhances calcification. Both light and dark calcification rates were greatly enhanced by feeding; after 8

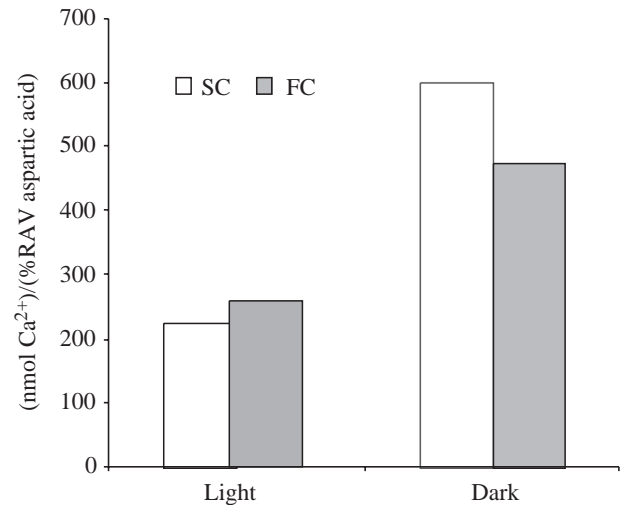

Fig. 6. Ratios of the calcification rates (nmol Ca<sup>2+</sup> 2 h<sup>-1</sup> g<sup>-1</sup> skeletal mass) to aspartic acid uptake (%RAV 2 h<sup>-1</sup> g<sup>-1</sup> skeletal mass) for the microcolonies of *Stylophora pistillata* maintained for 8 weeks under the two feeding conditions.

weeks of incubation, these rates were twice as high in fed than in starved corals. This stimulation had already been noticed in a previous experiment performed with the same species (Houlbrèque et al., 2003) and validates recent results showing a positive effect of heterotrophy on coral growth (Kim and Lasker, 1998; Anthony and Fabricius, 2000; Witting, 1999; Ferrier-Pagès et al., 2003). A light-enhanced (or dark-repressed) calcification (Goreau and Goreau, 1959; Barnes and Chalker, 1990; Gattuso et al., 1999; Houlbrèque et al., 2003) was also noticed with rates of dark calcification 6–10 times lower than rates of light calcification.

Calcification is carried out in two processes, i.e. the secretion of an organic matrix and the deposition of calcium carbonate. The presence of an organic matrix in corals has been a matter of much controversy (Constantz, 1986), but its existence is now well-demonstrated, both from studies performed on scleractinian corals (Goreau and Goreau, 1959; Cuif et al., 1997; Allemand et al., 1998) and on other calcifying organisms (Belcher et al., 1996; Falini et al., 1996). Cuif and Gautret (1999) showed that the amino acid composition of the organic matrix differs between zooxanthellate and azooxanthellate corals, suggesting that their nutritive source may affect the organic matrix synthesis. Aspartic acid, for example, is one of the major and most abundant amino acids in the coral matrix (Young, 1971; Cuif and Gautret, 1995; Dauphin and Cuif, 1997). Allemand et al. (1998) also showed that no aspartic acid pool was present inside the coral tissue, suggesting the need for a constant supply from an exogenous source. By using <sup>14</sup>C-aspartic acid as a precursor for organic matrix synthesis (Allemand et al., 1998), we measured a higher incorporation of this amino acid into the organic matrix of fed corals. Since feeding has increased the unlabelled amino acid pool present within the tissue, the rates of incorporation in fed animals are likely to be underestimated, suggesting that the

enhancement of the organic matrix synthesis by feeding is even higher.

Feeding might therefore have enhanced the construction of the organic matrix by (i) supplying additional input of energy, especially for the dark processes. Under high plankton concentrations, such as those provided for the fed corals in this study, uptake of organic carbon (and hence energy) may be significant and could provide some energy for calcium/proton exchange at night. Alternatively, the larger biomass of fed corals may have provided larger energy stores for dark processes (McConnaughey and Whelan, 1997; Anthony et al., 2002). Thus, feeding might have (ii) directly provided the necessary 'external' amino acids and/or (iii) indirectly increased photosynthesis and therefore the supply of 'autotrophic' amino acids. When normalized per amount of chlorophyll, the rates of photosynthesis were unchanged between fed and starved corals, suggesting that feeding does not increase the efficiency with which symbionts (or reaction centers) use light for photosynthesis. However, when normalized per surface area, the rates of photosynthesis were higher in fed corals, with a change in photosynthetic parameters, such as  $P_{\max}^n$  and  $I_k$ . The increase in  $P_{\max}^n$ , already observed by Titlyanov et al. (2001), generally corresponds to an increase in the number of photosynthetic units (Prezelin, 1987). Davy and Cook (2001) obtained similar results in fed and starved sea anemones and showed that the percentage translocation of photosynthates remained unchanged between the two treatments. This is presumably because the surplus carbon was stored by the algae rather than being translocated. However, several authors have demonstrated that even if the amount of translocated photosynthates is unchanged between starved and fed animals, their quality is completely different (Swanson and Hoegh-Guldberg, 1998; Wang and Douglas, 1999). Since the supply of nitrogen directly influences the zooxanthellar C:N ratio (Snidvongs and Kinzie III, 1994; Grover et al., 2002), feeding might have increased the amino acid synthesis compared to the production of non-nitrogenous compounds such as glycerol and glucose (Swanson and Hoegh-Guldberg, 1998; Wang and Douglas, 1999). This higher amount of translocated amino acids might have enhanced the synthesis of the organic matrix. However, this question can only be answered by investigating the quality of the photosynthates produced by fed and starved corals.

The second main conclusion that can be derived from this study is that the effect of feeding on aspartic acid incorporation is comparable to its effect on calcium incorporation. Feeding enhanced both light and dark processes, with a higher enhancement in the dark (threefold increase) than in the light (1.6-fold increase). To determine the link between the deposition of organic and mineral fractions, we compared the ratio of  $\text{CaCO}_3$ /aspartate incorporation. The dark ratio was 1.8–2.6 higher than the light ratio (for fed and starved corals, respectively), which suggests that the interactions between the organic and mineral fractions were affected by light/dark conditions. In the dark, there may have been a decrease in the organic matrix synthesis, an

increase in the mineral fraction deposition or a combination of both events. From Figs 4B and 5B, it appears that the more important process should be a decrease of dark organic-matrix synthesis. This decreased fourteen-fold (Fig. 5B), while dark calcification decreased only sevenfold (Fig. 4B). This phenomenon, observed here for the first time, could be responsible for the diurnal bands observed in coral skeletons (Barnes, 1973). A higher dark inhibition of organic matrix synthesis vs.  $\text{CaCO}_3$  deposition may be explained by the lack of photosynthates as organic matrix precursors (Cuif et al., 1999) or by some other unknown process. In either case, this suggests a close relationship between calcification, organic matrix synthesis and photosynthesis. These results are in agreement with the hypothesis of Barnes et al. (1989, 1990) and Taylor et al. (1993), who suggested a cyclic deposition of skeleton leading to the formation of skeletal banding in scleractinian corals.

Feeding did not affect the  $\text{CaCO}_3$ /aspartate deposition in the light. This result suggests a close coupling between organic matrix synthesis and  $\text{CaCO}_3$  deposition in the light. This coupling appears less strict in the dark where feeding induces a slight decrease of the ratio. Since it has been previously shown that the organic matrix synthesis is a prerequisite step for calcification (Allemand et al., 1998), the increase in the rates of calcification in fed corals might therefore be induced by an increase in the rates of feeding-induced organic matrix synthesis. Corals may derive some important source of amino acid and/or energy for their growth from external food supplies. Another conclusion can be drawn from the comparison of the ratio between starved/fed and light/dark treatments. Since these ratios were different from each other, we suggest that autotrophy and heterotrophy do not affect calcification in the same way.

This study was supported by the Centre Scientifique de Monaco. We are especially grateful to Dr M. Hayes for his helpful comments on the manuscript. We also thank C. Richard for technical assistance and S. Puverel for meaningful discussion regarding the organic matrix. We thank the referees and especially Dr K. Anthony for the improvements to this manuscript.

## References

- Allemand, D., Tambutté, E., Girard, J. P. and Jaubert, J. (1998). Organic matrix synthesis in the scleractinian coral *Stylophora pistillata*: role in biomineralization and potential target of the organotin tributyltin. *J. Exp. Biol.* **201**, 2001–2009.
- Anthony, K. R. N. (1999). Coral suspension feeding on fine particulate matter. *J. Exp. Mar. Biol. Ecol.* **232**, 85–106.
- Anthony, K. R. N. and Fabricius, K. E. (2000). Shifting roles of heterotrophy and autotrophy in coral energetics under varying turbidity. *J. Exp. Mar. Biol. Ecol.* **252**, 221–253.
- Anthony, K. R. N., Connolly, S. R. and Willis, B. L. (2002). Comparative analysis of energy allocation to tissue and skeletal growth in corals. *Limnol. Oceanogr.* **47**, 1417–1429.
- Barnes, D. J. (1973). Growth in colonial scleractinians. *Bull. Mar. Sci.* **23**, 280–298.
- Barnes, D. J., Lough, J. M. and Tobin, B. J. (1989). Density measurements and the interpretation of X-radiographic images of slices

- of skeleton from the colonial hard coral *Porites*. *J. Exp. Mar. Biol. Ecol.* **131**, 45-60.
- Barnes, D. J. and Chalker, B. E.** (1990). Calcification and photosynthesis in reef-building corals and algae. In *Ecosystems of the World*, vol 25, *Coral Reefs* (ed. Z. Dubinsky), pp. 109-131. Amsterdam: Elsevier.
- Belcher, A. M., Wux, X. H., Christensen, R. J., Hansma, P. K., Stucky, G. D. and Morse, D. E.** (1996). Control of crystal phase switching and orientation by soluble mollusc shell proteins. *Nature* **381**, 56-58.
- Buddemeier, R. W. and Kinzie, R. A.** (1976). Coral growth. *Oceanogr. Mar. Biol. Annu. Rev.* **14**, 183-225.
- Constantz, B. R.** (1986). Coral skeleton construction: A physiochemically dominated process. The Society of Economic Paleontologists and Mineralogists. *Palaios* **1**, 152-157.
- Constantz, B. and Weiner, S.** (1988). Acidic macromolecules associated with the mineral phase of scleractinian coral skeletons. *J. Exp. Zool.* **248**, 253-258.
- Cook, C. B., Muller-Parker, G., Orlandini, C. D.** (1994). Ammonium enhancement of dark carbon fixation and nitrogen limitation in zooxanthellae symbiotic with the reef corals *Madracis mirabilis* and *Montastrea annularis*. *Mar. Biol.* **118**, 157-165.
- Cuif, J. P. and Gautret, P.** (1995). Glucides et protéines de la matrice soluble des biocristaux de Scléractiniaires Acroporidés. *C. R. Acad. Sci. Paris II* **320**, 273-278.
- Cuif, J. P., Dauphin, Y. and Gautret, P.** (1997). Biomineralization features in scleractinian coral skeletons source of new taxonomic criteria. *Bol. Real. Soc. Esp. Hist. Nat. Section Geol.* **92**, 129-41.
- Cuif, J. P., Dauphin, Y., Freiwald, A., Gautret, P. and Zibrowius, H.** (1999). Biochemical markers of zooxanthellae symbiosis in soluble matrices of skeleton of 24 *Scleractinia* species. *Comp. Biochem. Physiol.* **123A**, 269-278.
- Dauphin, Y. and Cuif, J. P.** (1997). Isoelectric properties of the soluble matrices in relation to the chemical composition of some scleractinian skeletons. *Electrophoresis* **18**, 1180-1183.
- Davy, S. K. and Cook, C. B.** (2001). The relationship between nutritional status and carbon flux in the zooxanthellate sea anemone *Aiptasia pallida*. *Mar. Biol.* **139**, 999-1005.
- Dubinsky, Z., Stambler, N., Ben-Zion, M., McCloskey, L. R., Muscatine, L. and Falkowski, P. G.** (1990). The effect of external nutrient resources on the optical properties and photosynthetic efficiency of *Stylophora pistillata*. *Proc. R. Soc. Lond. B* **239**, 231-246.
- Falini, G., Albeck, S., Weiner, S. and Addadi, L.** (1996). Control of aragonite or calcite polymorphism by mollusk shell macromolecules. *Science* **271**, 67-69.
- Falkowski, P. G., Dubinsky, Z., Muscatine, L. and Porter, J. W.** (1984). Light and bioenergetics of a symbiotic coral. *Bioscience* **11**, 705-709.
- Farrant, P. A., Borowitzka, M. A., Hinde, R. and King, R. J.** (1987). Nutrition of the temperate Australian soft coral *Capnella gaboensis*. *Mar. Biol.* **95**, 575-581.
- Ferrier-Pagès, C., Allemand, A., Gattuso, J. P. and Jaubert, J.** (1998). Microheterotrophy in the zooxanthellate coral *Stylophora pistillata*: effects of light and ciliate density. *Limnol. Oceanogr.* **43**, 1639-1648.
- Ferrier-Pagès, C., Witting, J., Tambutté, E. and Sebens, K.** (2003). Effect of natural zooplankton feeding on the tissue and skeletal growth of the scleractinian coral *Stylophora pistillata*. *Coral Reefs* **22**, 229-240.
- Fitt, W. K.** (2000). Cellular growth of host and symbiont in a cnidarian-zooxanthellal symbiosis. **198**, 110-120.
- Furla, P., Allemand, D. and Orsenigo, M. N.** (2000). Involvement of H<sup>+</sup>-ATPase and carbonic anhydrase in inorganic carbon uptake for endosymbiotic photosynthesis. *Am. J. Physiol.* **278**, 870-881.
- Gattuso, J. P., Allemand, D. and Frankignoulle, M.** (1999). Photosynthesis and calcification at cellular, organismal and community levels in coral reefs: A review on interactions and control by carbonate chemistry. *Am. Zool.* **39**, 160-183.
- Goreau, T. F. and Goreau, N. I.** (1959). The physiology of skeleton formation in corals. II. Calcium deposition by hermatypic corals under different conditions. *Biol. Bull.* **117**, 239-250.
- Grover, R., Maguer, J. F., Reynaud-Vaganay, S. and Ferrier-Pagès, C.** (2002). Uptake of ammonium by the scleractinian coral *Stylophora pistillata*: Effect of feeding, light, and ammonium concentrations. *Limnol. Oceanogr.* **47**, 782-790.
- Houlbrèque, F., Tambutté, E. and Ferrier-Pagès, C.** (2003). Effect of zooplankton availability on the rates of photosynthesis, tissue and skeletal growth of the scleractinian coral *Stylophora pistillata*. *J. Exp. Mar. Biol. Ecol.* **296**, 145-166.
- Jacques, T. G. and Pilson, M. E. Q.** (1980). Experimental ecology of the temperate scleractinian coral *Astrangia danae*. I Partition of respiration, photosynthesis and calcification between host and symbionts. *Mar. Biol.* **60**, 167-178.
- Jeffrey, S. W. and Humphrey, G. F.** (1975). New spectrophotometric equations for determining chlorophylls a, b, c<sub>1</sub>, and c<sub>2</sub> in higher plants, algae, and natural phytoplankton. *Biochem. Physiol. Pflanz.* **17**, 191-194.
- Jokiel, P. L., Maragos, J. E., Franzisket, L.** (1978). Coral growth: buoyant weight technique. In *Coral Reefs: Research Methods. Monographs on Oceanographic Methodology*, vol. 5 (ed. D. R. Stoddart and R. E. Johannes), pp. 379-396. Paris: UNESCO.
- Kim, K. and Lasker, H. R.** (1998). Allometry of resource capture in colonial cnidarians and constraints on modular growth. *Funct. Ecol.* **12**, 646-654.
- Lasker, H. R., Gottfried, M. D. and Coffroth, M. A.** (1983). Effects of depth on the feeding capabilities of two octocorals. *Mar. Biol.* **73**, 73-78.
- Lewis, J. B.** (1992). Heterotrophy in corals: zooplankton predation by the hydrocoral *Millepora complanata*. *Mar. Ecol. Prog. Ser.* **90**, 251-256.
- Marsh, J. A., Jr.** (1970). Primary productivity of reef building calcareous red algae. *Ecology* **51**, 255-263.
- McConnaughey, T. A. and Whelan, J. F.** (1997). Calcification generates protons for nutrient and bicarbonate uptake. *Earth-Science Rev.* **967**, 95-117.
- Muscatine, L. and Cernichiaro, E.** (1969). Assimilation of photosynthetic products of zooxanthellae by a reef coral. *Biol. Bull.* **137**, 506-523.
- Muscatine, L.** (1980). Productivity of Zooxanthellae. In *Primary Productivity in the Sea* (ed. P. G. Falkowski, P. G.), pp. 381-402. New York: Plenum Publishing Corp.
- Muscatine, L.** (1990). The role of symbiotic algae in carbon and energy flux in reef corals. In *Ecosystems of the World*, vol 25, *Coral Reefs* (ed. Z. Dubinsky), pp. 75-87. Amsterdam: Elsevier.
- Muscatine, L., Ferrier-Pagès, C., Blackburn, A., Gates, R. D., Baghdasarian, G. and Allemand, D.** (1998). Cell-specific density of symbiotic dinoflagellates in tropical anthozoans. *Coral Reefs* **17**, 329-337.
- Prezelin, B. B.** (1987). Photosynthetic physiology of Dinoflagellates. In *The Biology of Dinoflagellates Botanical Monographs*, no. 21 (ed. F. J. R. Taylor), pp. 174-223. Oxford: Blackwell Scientific Publications.
- Rahav, O., Dubinsky, Z., Achituv, Y. and Falkowski, P. G.** (1989). Ammonium metabolism in the zooxanthellate coral, *Stylophora pistillata*. *Proc. R. Soc. Lond. B* **236**, 325-337.
- Rosenfeld, M., Bresler, V. and Abelson, A.** (1999). Sediment as a possible source of food for corals. *Ecol. Lett.* **2**, 345-348.
- Sebens, K. P., Johnson, A. S.** (1991). Effects of water movement on prey capture and distribution of reef corals. *Hydrobiol.* **216/217**, 247-248.
- Sebens, K. P., Vandersall, K. S., Savina, L. A. and Graham, K. R.** (1996). Zooplankton capture by two scleractinian corals, *Madracis mirabilis* and *Montastrea cavernosa*, in a field enclosure. *Mar. Biol.* **127**, 303-317.
- Smith, P. K., Krohn, R. I., Hermanson, G. T., Mallia, A. K., Gartner, F. H., Provenzano, M. D., Fujimoto, E. K., Goeke, N. M., Olson, B. J., Klenk, D. C.** (1985). Measurement of protein using bicinchoninic acid. *Anal. Biochem.* **150**, 76-85.
- Snidvongs, A. and Kinzie III, R. A.** (1994). Effects of nitrogen and phosphorus enrichment on *in vivo* symbiotic zooxanthellae *Pocillopora damicornis*. *Mar. Biol.* **118**, 705-711.
- Sorokin, Y. U.** (1991). Biomass, metabolic rates and feeding of some common reef Zoantharians and Octocorals. *Aust. J. Mar. Freshwater Res.* **42**, 729-741.
- Swanson, R. and Hoegh-Guldberg, O.** (1998). Amino acid synthesis on the symbiotic sea anemone *Aiptasia pallida*. *Mar. Biol.* **131**, 83-93.
- Szmant-Froelich, A. and Pilson, M. E.** (1984). Effect of feeding frequency and symbiosis with zooxanthellae on nitrogen metabolism and respiration of the coral *Astrangia danae*. *Mar. Biol.* **81**, 153-162.
- Tambutté, E., Allemand, D., Bourge, I., Gattuso, J. P. and Jaubert, J.** (1995). An improved <sup>45</sup>Ca protocol for investigating physiological mechanisms in coral calcification. *Mar. Biol.* **122**, 453-459.
- Tambutté, E., Allemand, D., Mueller, E. and Jaubert, J.** (1996). A compartmental approach to the mechanism of calcification in hermatypic corals. *J. Exp. Biol.* **199**, 1029-1041.
- Taylor, R. B., Barnes, D. J. and Lough, J. M.** (1993). Simple models of density band formation in massive corals. *J. Exp. Mar. Biol. Ecol.* **167**, 109-125.
- Titlyanov, E. A., Tsukahara, J., Titlyanova, T. V., Leletkin, V. A., Van Woessik, R. and Yamazato, K.** (2000a). Zooxanthellae population density and physiological state of the coral *Stylophora pistillata* during starvation and osmotic shock. *Symbiosis* **28**, 303-322.



- Titlyanov, E. A., Bil, K., Fomina, L., Titlyanova, T., Leletkin, V., Eden, N., Malkin, A. and Dubinsky, Z.** (2000b). Effects of dissolved ammonium addition and host feeding with *Artemia salina* on photoacclimation of the hermatypic coral *Stylophora pistillata*. *Mar. Biol.* **137**, 463-472.
- Titlyanov, E. A., Titlyanova, T. V., Yamazato, K. and Van Woesik, R.** (2001). Photoacclimation of the hermatypic coral *Stylophora pistillata* while subjected to either starvation or food provisioning. *J. Exp. Mar. Biol. Ecol.* **257**, 163-181.
- Wainwright, S. A.** (1963). Skeletal organization in the coral, *Pocillopora damicornis*. *Quart. J. Microsc. Sci.* **104**, 169-183.
- Wang, J. T. and Douglas, A. E.** (1999). Essential amino acid synthesis and nitrogen recycling in an alga-invertebrate symbiosis. *Mar. Biol.* **135**, 219-222.
- Weiner, S. and Addadi, L.** (1991). Acidic macromolecules of mineralized tissues. The controllers of crystal formation. *Trends Biochem. Sci.* **16**, 252-256.
- Witting, J. H.** (1999). Zooplankton capture and coral growth: the role of heterotrophy in Caribbean reef corals. PhD dissertation, Northeastern University, Boston, MA, USA. 285 pp.
- Young, S. D.** (1971). Organic material from scleractinian skeletons. I Variation in composition between several species. *Comp. Biochem. Physiol.* **40B**, 113-120.
